# Supplementary material for: TMEM200A is a potential prognostic biomarker and correlated with immune infiltrates in gastric cancer
Source: PeerJ journal article supplement (doi:10.7717/peerj.15613), 2023-06-29
Supplement: Figure_S1.pdf [file Figure_S1.pdf]

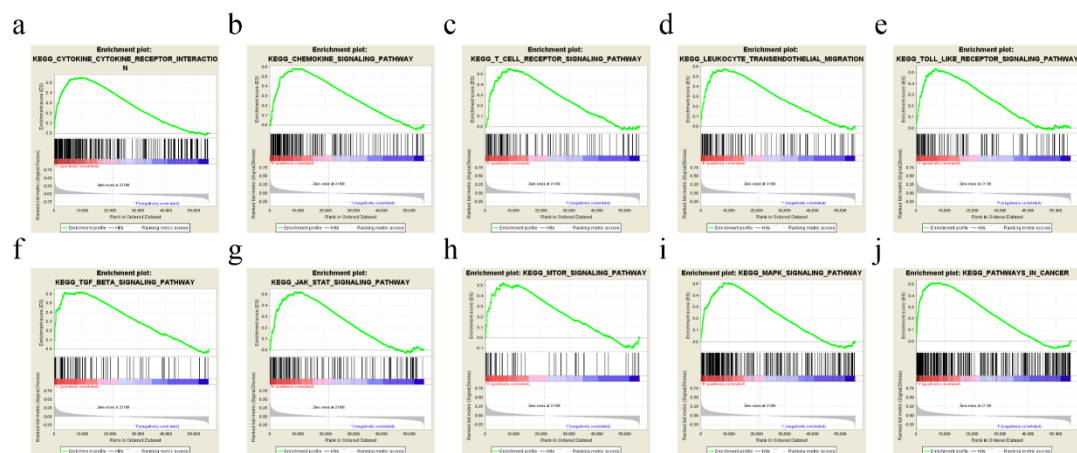

**Figure S1: The significantly enriched signaling pathways associated with the increased TMEM200A expression. (a)** Cytokine-cytokine receptor interaction, **(b)** chemokine signaling pathway, **(c)** T cell receptor signaling pathway, **(d)** leukocyte transendothelial migration, **(e)** Toll-like receptor signaling pathway, **(f)** TGF- $\beta$  signaling pathway, **(g)** JAK-STAT signaling pathway, **(h)** mTOR signaling pathway, **(i)** MAPK signaling pathway, **(j)** pathway in cancer.
